# Supplementary material
Source: PubMed Central journal article supplement (PMC4294603)
Supplement: supp_the2014-0187_Supplemental_Appendix.pdf [file supp_the2014-0187_Supplemental_Appendix.pdf]

Supplemental Appendix for:

Chemotherapy Dose Adjustment for Obese Patients Undergoing Hematopoietic Stem Cell Transplantation: A Survey on Behalf of the Acute Leukemia Working Party of the EBMT

Leila Moukhtari et al.

### **List of participating centers:**

Centre Pierre et Marie Curie, Service Hématologie Greffe de Moëlle, Alger, Algeria

University of Amiens: CHU Amiens, Service d'Hématologie, Amiens, France

Ankara Bayindir Hospital, Haematology BMT, Ankara, Turkey

Centro di Riferimento Oncologico, C.R.O. IRCCS Aviano, Aviano, Italy

Institut Catala d'Oncologia, Hospital Universitari Germans Triasi Pujol, Badalona, Spain

Department of Internal Medicine, American University of Beirut Medical Center, Beirut, Lebanon

Haukeland University Hospital, Department of Haematology, Bergen, Norway

University Hospital Bern, Clinic of Oncology, Bern, Switzerland

Ospedale A. Businco Cagliari, Haematology & Transplant Centrè Wilma Deplano, Cagliari, Italy

Canterbury Health Laboratories, Department of Haematology, Christchurch, New Zealand

Unità Operativa Di Medicina Interna, Civitanove Marche, Italy

Bone Marrow Transplant Unit L 4043, Copenhagen, Denmark

Hopital Henri Mondor, Unite Hemopathies Lymphoides, Creteil, France

St. James Hospital Trinity College, Dublin, Ireland

FOSCAL-UNAB, Floridablanca Santander, Colombia

University of Freiburg, Freiburg, Germany

Ospedale San Martino, Department of Haematology II, Genova, Italy

Department of Bone Marrow Transplantation, Maria Sklodowska-Curie Memorial Cancer Center and Institute of Oncology, Gliwice Branch, Gliwice, Poland

Klinik für Innere Medizin C, Hämatologie und Onkologie, Transplantationszentrum, Palliativmedizin, Greifswald, Germany

Hannover Medical School, Department of Haematology, Hemostasis, Oncology and Stem Cell Transplantation, Hannover, Germany

Ospedale Santa Maria Goretti, Ematologia, Latina, Italy

Leiden University Hospital, BMT Centre Leiden, Leiden, The Netherlands

Hospital dos Capuchos, Servico de Hematologia, Lisboa, Portugal

University Hospital, Dept. of Hematology, Lund, Sweden

Centre Leon Berard, Lyon, France

University Hospital Maastricht, Dept. Internal Med. Hematology /Oncology, Maastricht, The Netherlands

Hospital Ramón y Cajal, Servicio de Hematología, Madrid, Spain

Ospedale San Gerardo, Clinica Ematologica dell'Università Milano-Bicocca, Monza, Italy

University of Münster, Dept. of Hematol./Oncol., Münster, Germany

Hospital Universitario Virgen de la Arrixaca, Murcia, Spain

St. Antonius Hospital, Dept. of Internal Medicine, Nieuwegein, The Netherlands

Klinikum Nürnberg, 5. Medizinische Klinik, BMT-Unit, Nürnberg, Germany

Oulu University Central Hospital, Oulu, Finland

A.R.N.A.S. Civico - Di Cristina, U.O. EMATOLOGIA, Palermo, Italy

Hospital Saint Antoine, Department of Hematology, Paris, France

Hôpital St. Louis, Service Hemato-oncologie - Adulte, Paris, France

RP Group Royal Perth Hospital, Department of Haematology, South Metropolitan Area Health Service, Perth, Australia

Beilinson Hospital, Hematology and BMT Department, Petach-Tikva, Israel

Hospices Civils de Lyon, Dept. Haematology, Pierre-Benite, France

Charles University Hospital, Dept. of Hematology/Oncology, Pilsen, Czech Republic

Ospedale San Carlo, Dip. Ematologia, Potenza, Italy

Kaplan Medical Centre, Hematology Institute, Rehovot, Israel

King Faisal Specialist Hospital & Research Centre Oncology (Section of Adult Haematology/BMT), Riyadh, Saudi Arabia

Heilig Hartziekenhuis, Hematology - Oncology Dept., Roeselare, Belgium

Ospedale S. Camillo, Haematology & SCT Unit, Rome, Italy

Università Cattolica S. Cuore, Istituto di Ematologia, Rome, Italy

Istituto Di Ematologia, Università Di Sassari, Sassari, Italy

Federal Centre of Heart, Blood and Endocrinology, Dept. of Hematology, St. Petersburg, Russia

Klinikum Stuttgart-Olgahospital, Dep. of Oncology, Haematology and Immunology, Zentrum für Kinder- und Jugendmedizin Olgahospital, Stuttgart, Germany

Tel-Aviv University, Tel-Hashomer, Israel

Centre National de Greffe de Moelle, Tunis, Tunisia

AZ Turnhout, Hemato-Oncology, Turnhout, Belgium

Umea University Hospital, Hematology, Umeå, Sweden

University Hospital, Dept. of Medicine, Uppsala, Sweden

Medizinische Universität Wien Klinik für Innere Medizin I, Knochenmarkstransplantation, Vienna, Austria

University Hospital Dubrava, Department of Haematology, Zagreb, Croatia
